# Supplementary material for: Resolving the Ortholog Conjecture: Orthologs Tend to Be Weakly, but Significantly, More Similar in Function than Paralogs
Source: PLOS journal article supplement (doi:10.1371/journal.pcbi.1002514), 2012-05-17
Supplement: S5 (10.1371/journal.pcbi.1002514.s005) [file journal.pcbi.1002514.s005]

# Different metrics of protein divergence (Yeasts only)

## A: Percent Identity

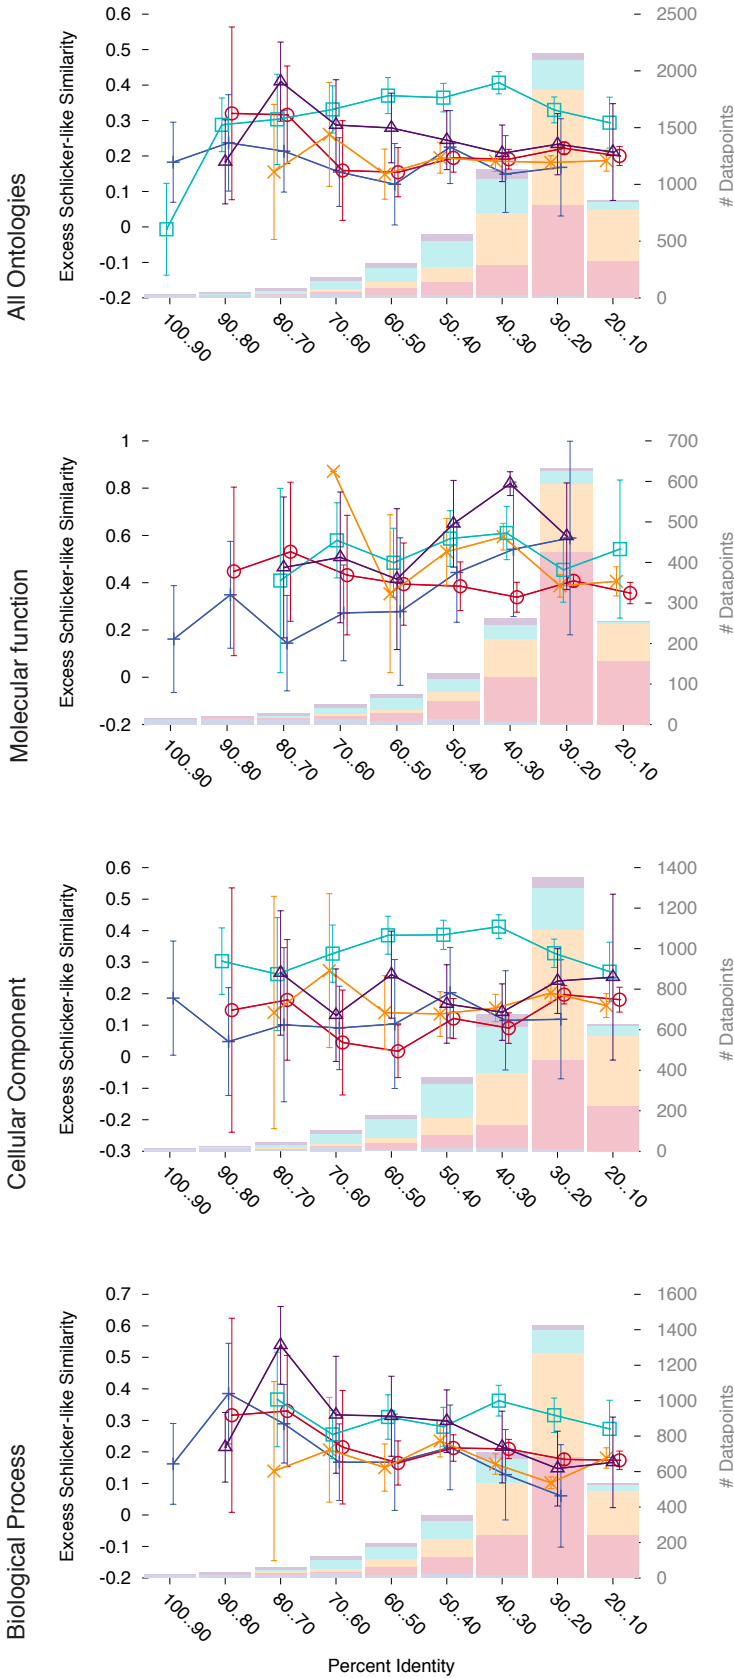

## B: PAM

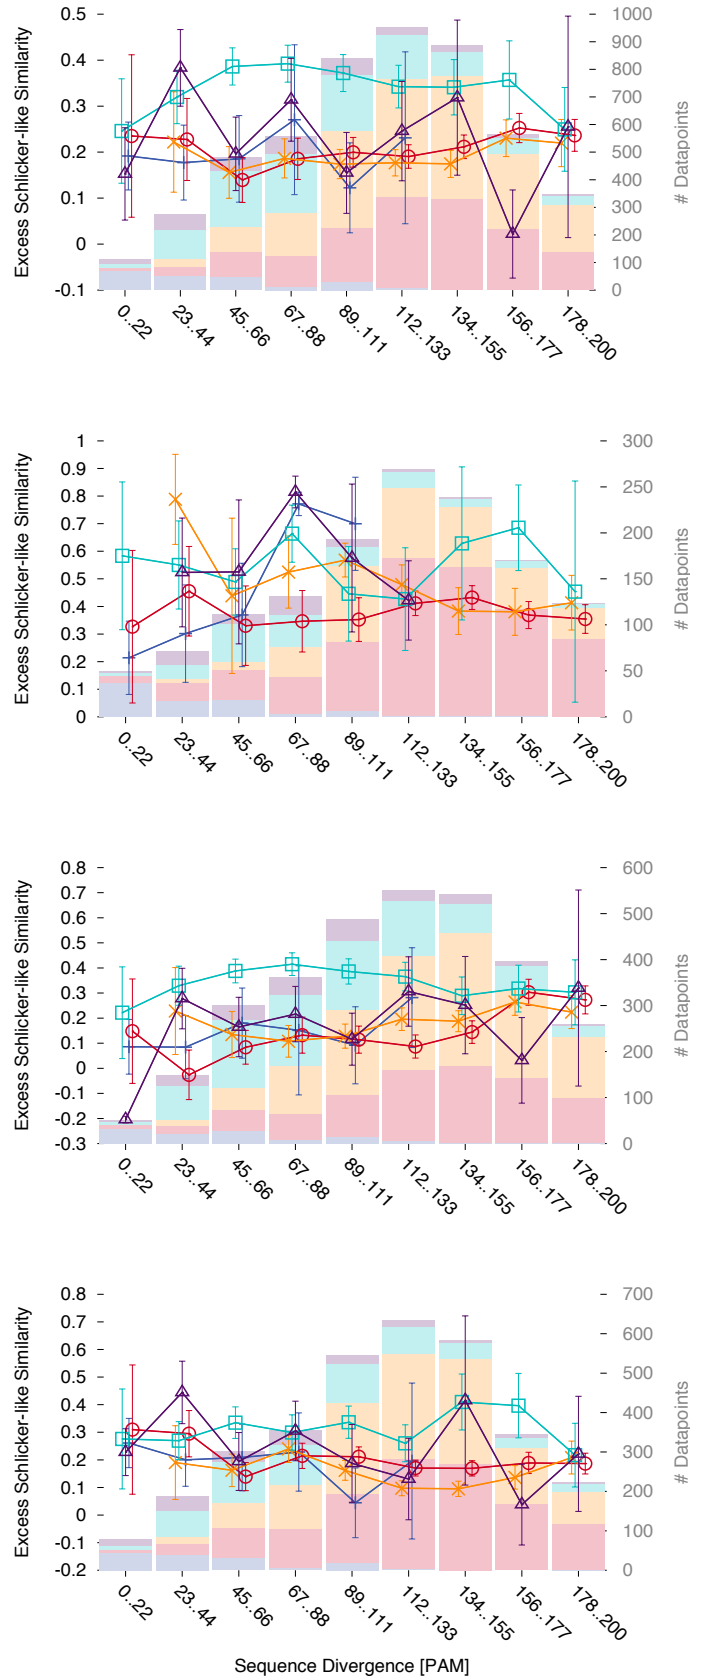

Inparalogs +  
 Within-spec. outparalogs o  
 Between-spec. outparalogs x

1:1 orthologs □  
 Other orthologs △
