# Supplementary material for: Resolving the Ortholog Conjecture: Orthologs Tend to Be Weakly, but Significantly, More Similar in Function than Paralogs
Source: PLOS journal article supplement (doi:10.1371/journal.pcbi.1002514), 2012-05-17

# Control for domination of single species pair

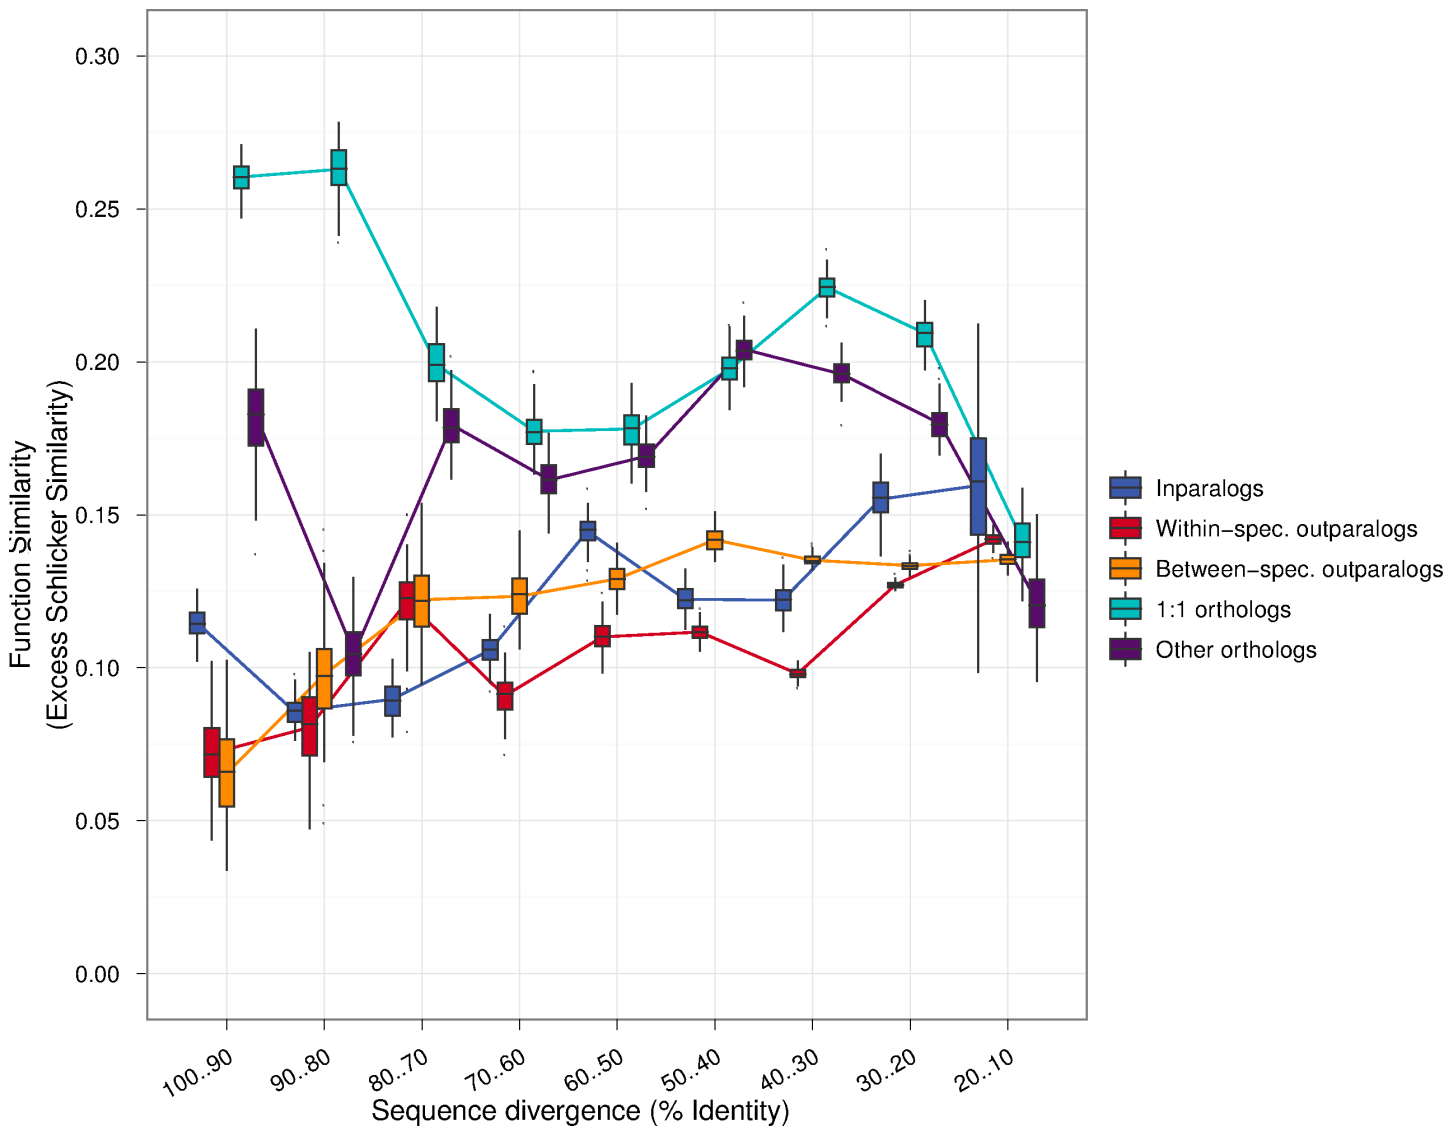

Supplement: S12 (10.1371/journal.pcbi.1002514.s012) [file journal.pcbi.1002514.s012]
