# Supplementary material for: Resolving the Ortholog Conjecture: Orthologs Tend to Be Weakly, but Significantly, More Similar in Function than Paralogs
Source: PLOS journal article supplement (doi:10.1371/journal.pcbi.1002514), 2012-05-17

# Control for gene family over-representation (OMA homologs)

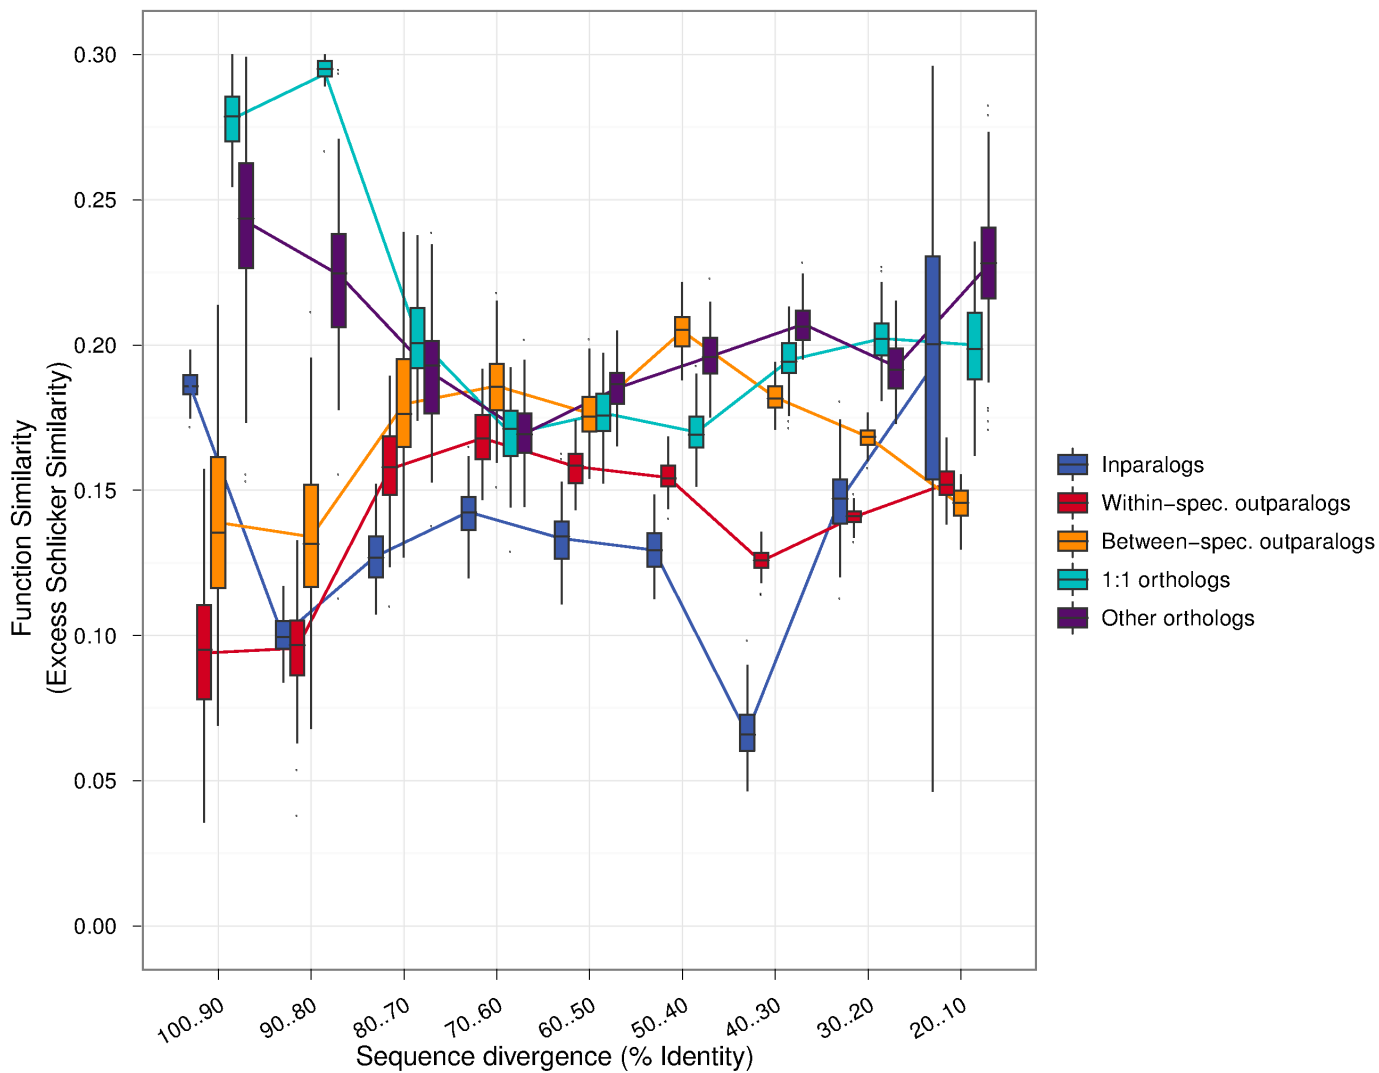

Supplement: S13 (10.1371/journal.pcbi.1002514.s013) [file journal.pcbi.1002514.s013]
